# Supplementary material
Source: publisher figshare collection journal article supplement (https://acs.figshare.com/ndownloader/files/20766816)
Supplement: Supplementary file 1 [file 20766816]

## Supporting Information

### **N/P-dual-doped carbon coated $\text{Na}_3\text{V}_2(\text{PO}_4)_2\text{O}_2\text{F}$ microspheres as high-performance cathode material for sodium-ion batteries**

Lu-Lu Zhang<sup>1</sup>, Jing Liu<sup>1</sup>, Cheng Wei<sup>1</sup>, Pan-Pan Sun<sup>1</sup>, Lin Gao<sup>1</sup>, Xiao-Kai Ding<sup>2</sup>, Gan Liang<sup>3</sup>, Xue-Lin Yang<sup>1,\*</sup>, and Yun-Hui Huang<sup>4,\*</sup>

<sup>1</sup> College of Materials and Chemical Engineering, Hubei Provincial Collaborative Innovation Center for New Energy Microgrid, China Three Gorges University, 8 Daxue Road, Yichang, Hubei 443002, China

<sup>2</sup> School of Chemical Engineering & Light Industry, Guangdong University of Technology, Guangzhou, 510006, Guangdong, China

<sup>3</sup> Department of Physics, Sam Houston State University, Huntsville, Texas 77341, USA

<sup>4</sup> School of Materials Science and Engineering, State Key Laboratory of Material Processing and Die & Mould Technology, Huazhong University of Science and Technology, 1037 Luoyu Road, Wuhan, Hubei 430074, China

\*Corresponding authors: xlyang@ctgu.edu.cn; huangyh@hust.edu.cn

## **Material characterization**

The crystal structure and phase of the obtained samples were examined by X-ray powder diffraction (XRD, Rigaku RINT-2000) with Cu-K $\alpha$  radiation, and the diffraction data was recorded within the 2 $\theta$  range from 10 to 80°. The structural refinement was carried out by the Rietveld method using the GSAS software. The morphology was observed by a field emission scanning electron microscopy (FESEM, JSM-7500F, JEOL) and a high resolution transmission electron microscope (HRTEM, Talos F200X, Thermo Fisher). To verify whether nitrogen and phosphorus are doped into the carbon coating on the NVPOF@P/N/C surface, X-ray photoelectron spectroscopy (XPS, PHI Quantera, U-P) was conducted. The specific surface area and pore size distribution were analyzed by Brunauer-Emmett-Teller (BET) nitrogen adsorption-desorption measurement (ASAP2020, Micromeritics). The carbon content and electronic conductivity of samples were determined by a thermal analyzer (STA 449 F3, NETZSCH, Germany) under flowing oxygen and a powder resistivity measurement system (FT-300I, Rico, China), respectively. The tap density of samples was measured by a powder vibration densitometer (JZ-1, Chengdu Jingxin).

## **Electrochemical measurements**

The cathode electrodes were fabricated by mixing active material such as NVPOF, NVPOF@C, NVPOF@N/C, NVPOF@P/C and NVPOF@P/N/C (80 wt.%) with acetylene black conductor (10 wt.%) and PVDF binder (10 wt.%) in N-methyl-2-pyrrolidone. The mixed slurry was uniformly pasted on an Al foil to

obtain the electrode film. After drying, the film was punched into discs (14 mm in diameter) and pressed with ~6 MPa pressure. After drying at 120 °C for 12 h in vacuum, the electrode discs were transferred into an argon-filled glove box (Super 1220/750, Mikrouna). To assemble the CR2025 coin cells, the obtained discs were used as working electrode, sodium flake as anode electrode, Grade GF/D as separators, and 1M NaClO<sub>4</sub>/(EC+DMC+EMC) (volume ratio, 1:1:1) with 2 vol.% FEC (fluoroethylene carbonate) as electrolyte. The mass loading of electrodes is ~1.2 mg cm<sup>-2</sup>. Galvanostatic charge/discharge measurements were performed within the voltage range of 3.0-4.5 V at room temperature on a cell testing system (CT2001A, LAND). The cyclic voltammetry (CV) tests in the voltage range between 3.0-4.5 V and electrochemical impedance spectra (EIS) measurements with the frequency range from 0.01 Hz to 100 kHz were performed on electrochemical working station (CHI614C, China).

**Table S1** The  $R_{ct}$  and  $D_{Na^+}$  values from EIS data of samples.

| Samples     | $R_{ct} / \Omega$ | $D_{Na^+} / \text{cm}^2 \text{ s}^{-1}$ |
|-------------|-------------------|-----------------------------------------|
| NVPOF       | 474.8             | $6.7 \times 10^{-14}$                   |
| NVPOF@C     | 453.3             | $7.3 \times 10^{-14}$                   |
| NVPOF@P/C   | 311.1             | $1.5 \times 10^{-13}$                   |
| NVPOF@N/C   | 324.8             | $1.4 \times 10^{-13}$                   |
| NVPOF@P/N/C | 233.5             | $2.8 \times 10^{-13}$                   |

**Table S2** The discharge capacity (D.C.) and capacity retention (C.R.) of samples.

| Samples     | 0.5 C                       |                   |                   | 2 C                         |                   |                   |
|-------------|-----------------------------|-------------------|-------------------|-----------------------------|-------------------|-------------------|
|             | D.C. (mAh g <sup>-1</sup> ) |                   | C.R. <sup>a</sup> | D.C. (mAh g <sup>-1</sup> ) |                   | C.R. <sup>b</sup> |
|             | 1 <sup>st</sup>             | 100 <sup>th</sup> | (%)               | 1 <sup>st</sup>             | 500 <sup>th</sup> | (%)               |
| NVPOF       | 84.2                        | 69.9              | 83.0              | 51.4                        | 27.0              | 52.5              |
| NVPOF@C     | 116.3                       | 98.5              | 84.7              | 92.1                        | 55.0              | 59.7              |
| NVPOF@P/C   | 120.5                       | 111.3             | 92.4              | 112.1                       | 89.6              | 79.9              |
| NVPOF@N/C   | 117.4                       | 97.7              | 83.2              | 109.8                       | 75.9              | 69.1              |
| NVPOF@P/N/C | 128.0                       | 118.7             | 92.7              | 122.0                       | 99.4              | 81.5              |

C.R.<sup>a</sup> is the capacity retention ratio of the 100th capacity to the 1st capacity at 0.5 C.

C.R.<sup>b</sup> is the capacity retention ratio of the 500th capacity to the 1st capacity at 2 C.

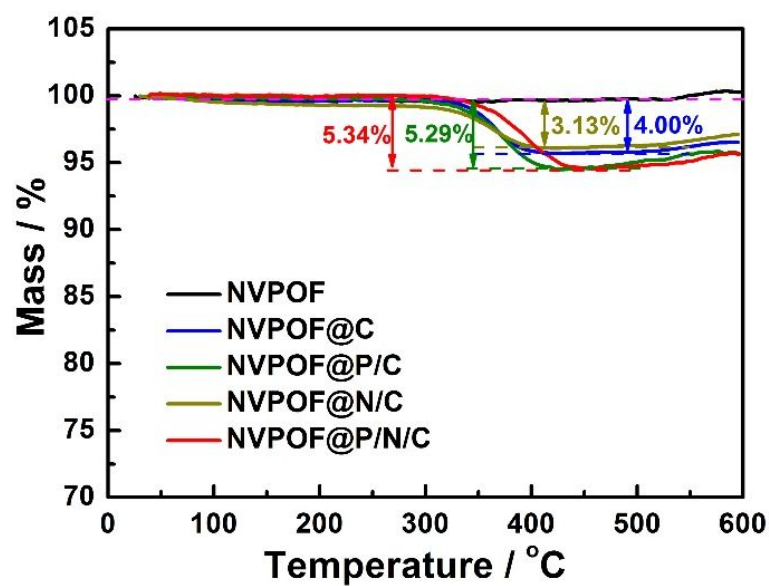

**Figure S1** TG curves of NVPOF, NVPOF@C, NVPOF@P/C, NVPOF@N/C and NVPOF@P/N/C.

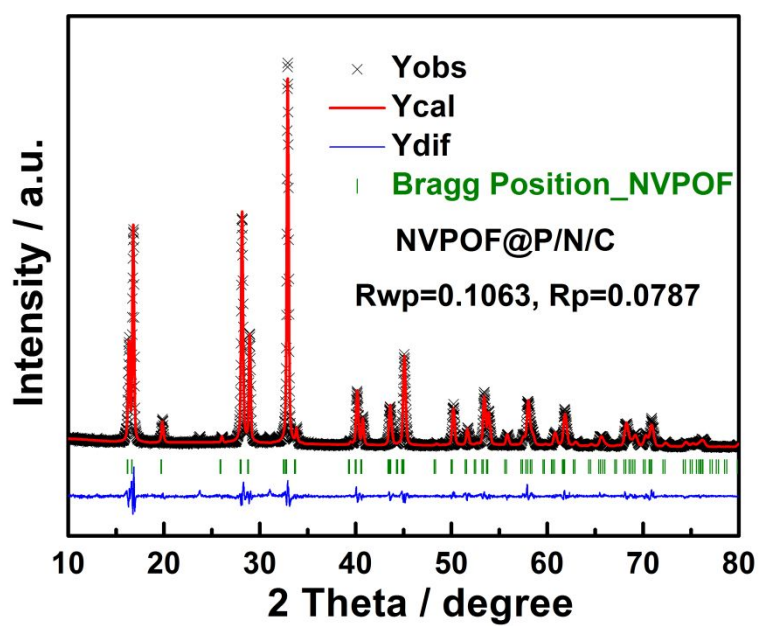

**Figure S2** The Rietveld refinement results of NVPOF@P/N/C.

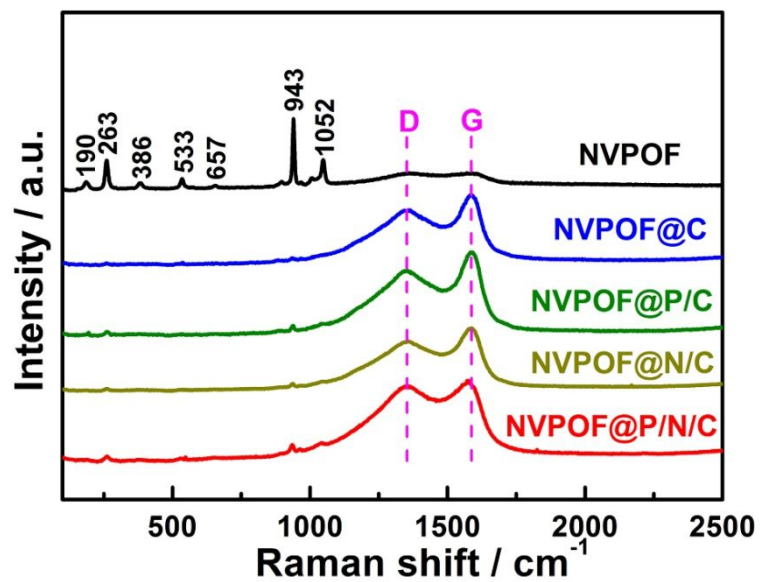

**Figure S3** Raman spectra of NVPOF, NVPOF@C, NVPOF@P/C, NVPOF@N/C and NVPOF@P/N/C.

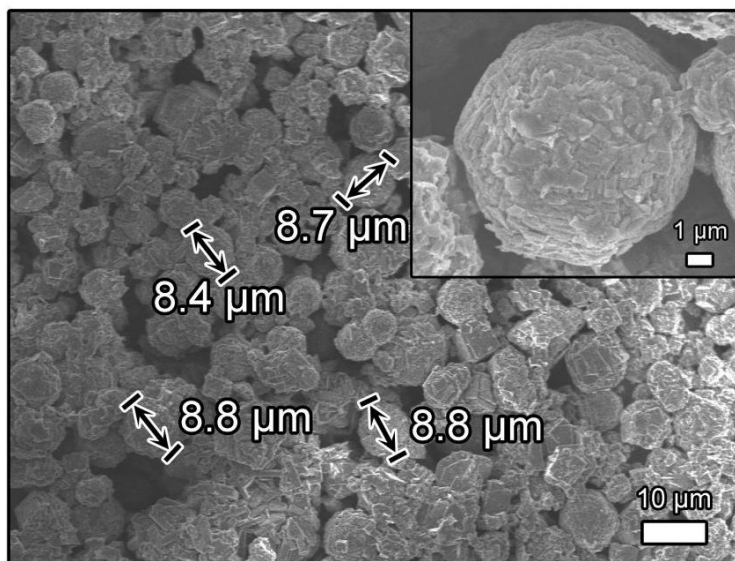

**Figure S4** SEM image of the NVPOF@P/N/C precursor. The inset is the corresponding high-magnification SEM image.

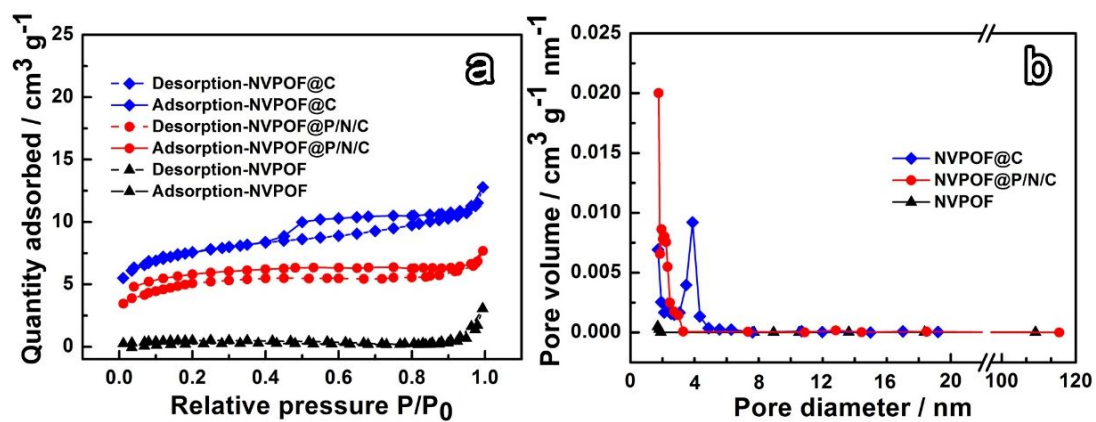

**Figure S5** (a) Nitrogen adsorption-desorption isotherms, and (b) BJH pore size distribution of NVPOF, NVPOF@C and NVPOF@P/N/C.

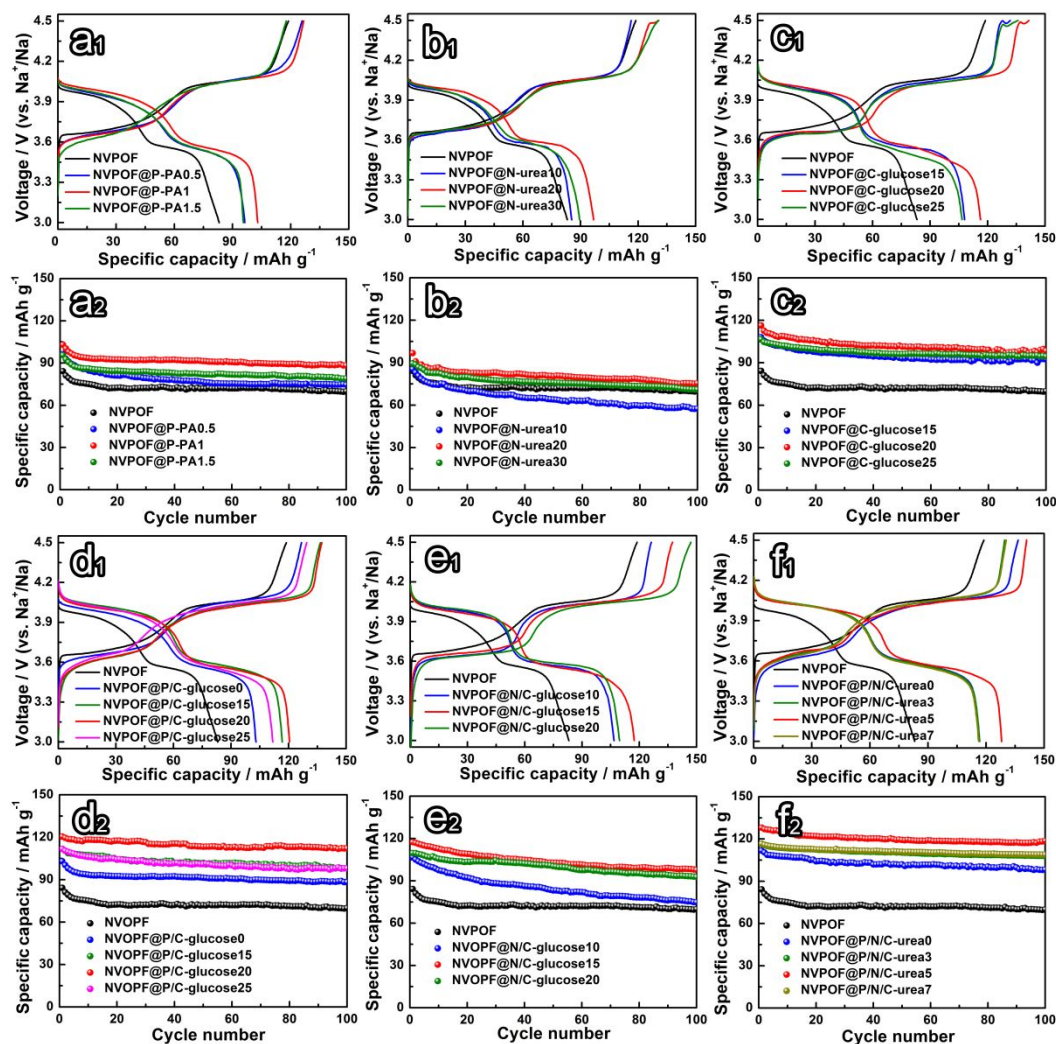

**Figure S6** (a<sub>1</sub>,a<sub>2</sub>) Charge/discharge profiles and cycle performance of NVPOF@P with different amount of PA. (b<sub>1</sub>,b<sub>2</sub>) Charge/discharge profiles and cycle performance of NVPOF@N with different amount of urea. (c<sub>1</sub>,c<sub>2</sub>) Charge/discharge profiles and cycle performance of NVPOF@C with different amount of glucose. (d<sub>1</sub>,d<sub>2</sub>) Charge/discharge profiles and cycle performance of NVPOF@P/C with different amount of PA and glucose. (e<sub>1</sub>,e<sub>2</sub>) Charge/discharge profiles and cycle performance of NVPOF@N/C with different amount of urea and glucose. (f<sub>1</sub>,f<sub>2</sub>) Charge / discharge



profiles and cycle performance of NVPOF@P/N/C with different amount of PA, urea and glucose.

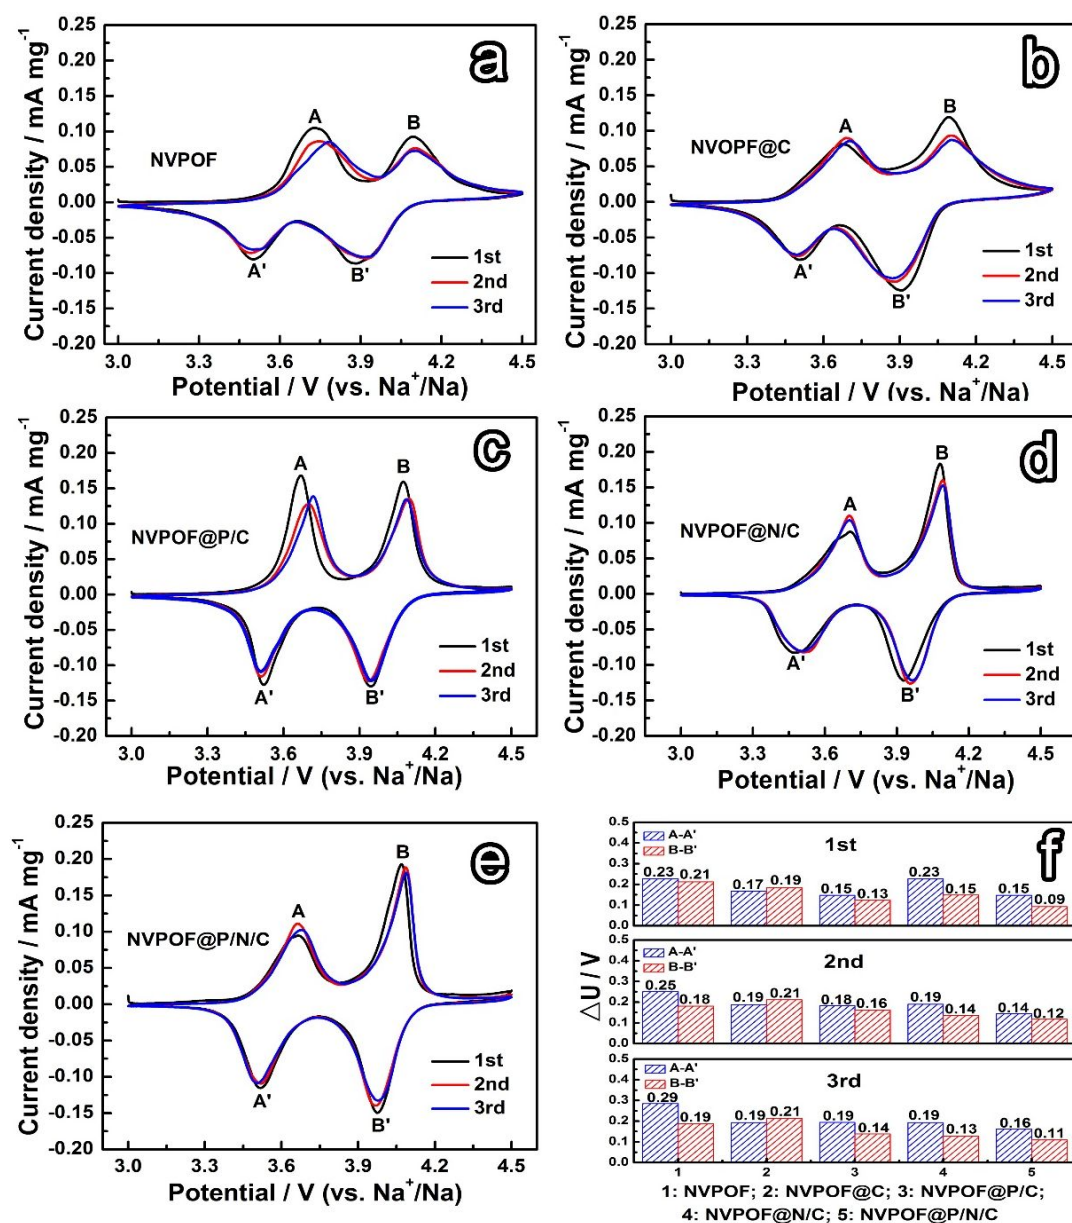

**Figure S7** (a-e) CV curves of the first three cycles for the obtained samples at a scan rate of 0.1 mV s<sup>-1</sup> between 3.0 and 4.5 V. (f) The potential difference between reduction and oxidation peaks of the first three cycles for samples.

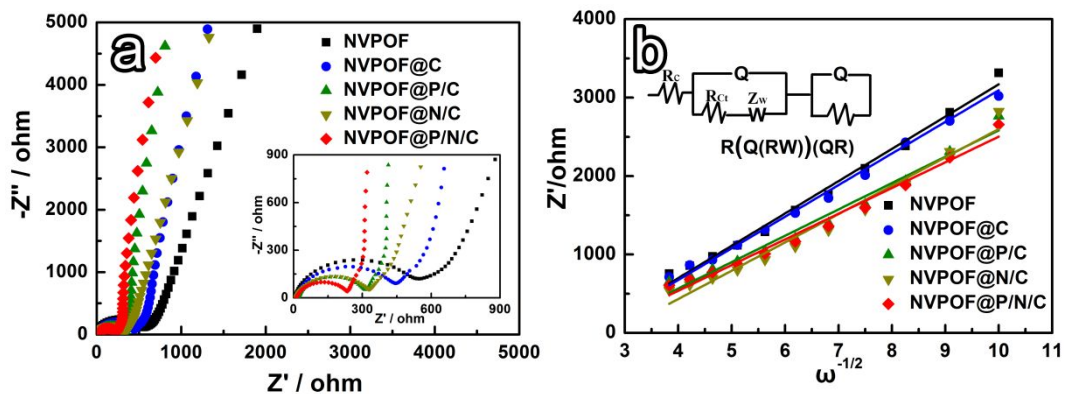

**Figure S8** (a) EIS curves with the frequency range from 0.01 Hz to 100 kHz. (b) The relationship lines between  $Z'$  and  $\omega^{-1/2}$  in the low frequency region of different fresh electrodes.
